# Supplementary material for: The role of the small intestine in the development of dietary fat-induced obesity and insulin resistance in C57BL/6J mice
Source: PubMed Central journal article supplement (PMC2396659; doi:10.1186/1755-8794-1-14), 2008-05-06

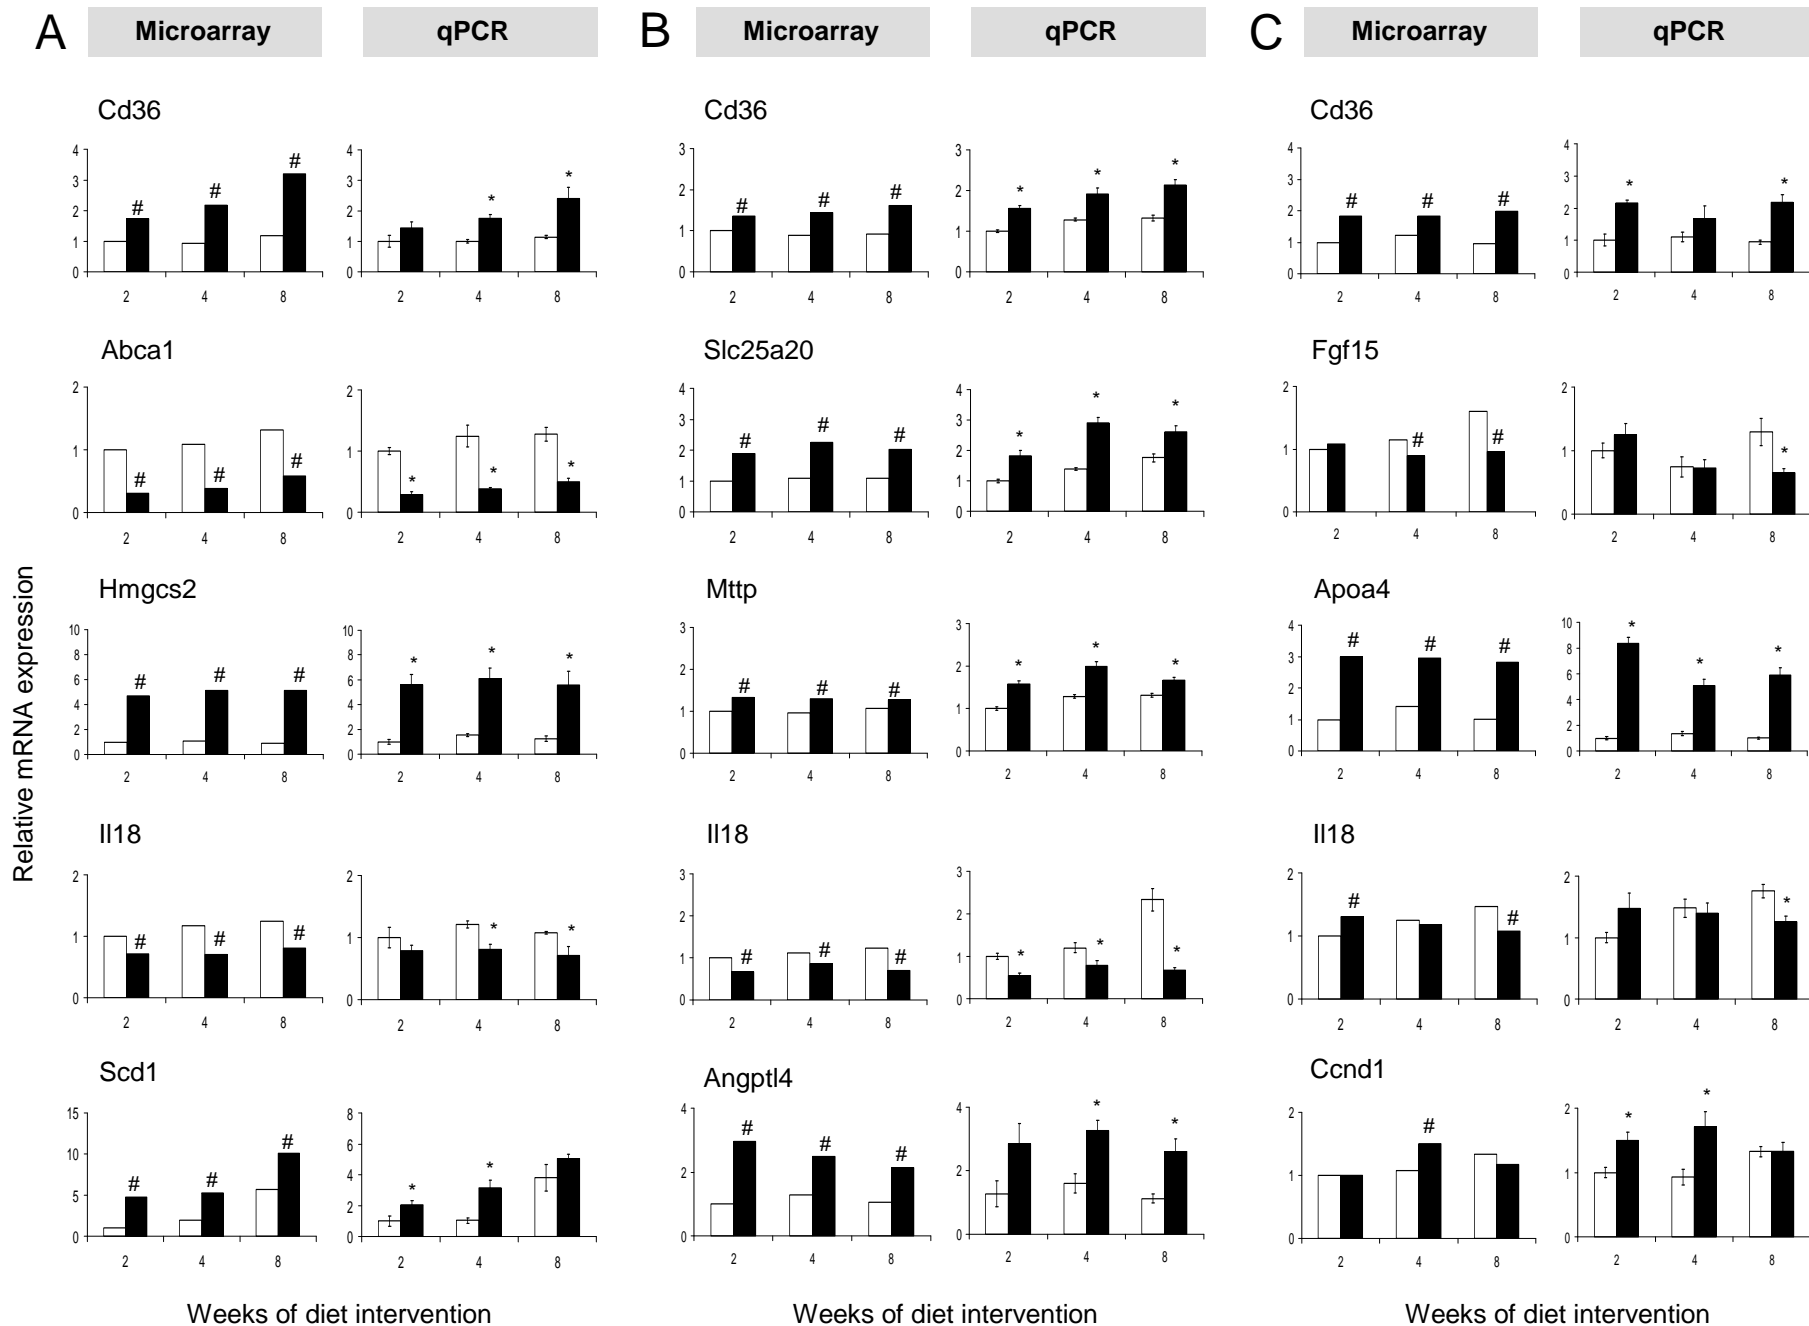

Supplement: 1755-8794-1-14-S5.pdf [file 1755-8794-1-14-S5.pdf]
